# Supplementary material
Source: ML conference proceedings conference paper supplement (https://proceedings.mlr.press/v97/ryu19a.html)
Supplement: Supplementary file [file ryu19a-supp.pdf]

## 8. Preliminaries

For any  $x, y \in \mathbb{R}^d$ , write  $\langle x, y \rangle = x^T y$  for the inner product. We say a function  $f : \mathbb{R}^d \rightarrow \mathbb{R} \cup \{\infty\}$  is convex if

$$f(\theta x + (1 - \theta)y) \leq \theta f(x) + (1 - \theta)f(y)$$

for any  $x, y \in \mathbb{R}^d$  and  $\theta \in [0, 1]$ . A convex function is closed if it is lower semi-continuous and proper if it is finite somewhere. We say  $f$  is  $\mu$ -strongly convex for  $\mu > 0$  if  $f(x) - (\mu/2)\|x\|^2$  is a convex function. Given a convex function  $f : \mathbb{R}^d \rightarrow \mathbb{R} \cup \{\infty\}$  and  $\alpha > 0$ , define its proximal operator  $\text{Prox}_f : \mathbb{R}^d \rightarrow \mathbb{R}^d$  as

$$\text{Prox}_{\alpha f}(z) = \underset{x \in \mathbb{R}^d}{\text{argmin}} \{ \alpha f(x) + (1/2)\|x - z\|^2 \}.$$

When  $f$  is convex, closed, and proper, the argmin uniquely exists, and therefore  $\text{Prox}_f$  is well-defined. An mapping  $T : \mathbb{R}^d \rightarrow \mathbb{R}^d$  is  $L$ -Lipschitz if

$$\|T(x) - T(y)\| \leq L\|x - y\|$$

for all  $x, y \in \mathbb{R}^d$ . If  $T$  is  $L$ -Lipschitz with  $L \leq 1$ , we say  $T$  is nonexpansive. If  $T$  is  $L$ -Lipschitz with  $L < 1$ , we say  $T$  is a contraction. A mapping  $T : \mathbb{R}^d \rightarrow \mathbb{R}^d$  is  $\theta$ -averaged for  $\theta \in (0, 1)$ , if it is nonexpansive and if

$$T = \theta R + (1 - \theta)I,$$

where  $R : \mathbb{R}^d \rightarrow \mathbb{R}^d$  is another nonexpansive mapping.

**Lemma 4** (Proposition 4.35 of (Bauschke & Combettes, 2017)).  *$T : \mathbb{R}^d \rightarrow \mathbb{R}^d$  is  $\theta$ -averaged if and only if*

$$\|T(x) - T(y)\|^2 + (1 - 2\theta)\|x - y\|^2 \leq 2(1 - \theta)\langle T(x) - T(y), x - y \rangle$$

for all  $x, y \in \mathbb{R}^d$ .

**Lemma 5** ((Ogura & Yamada, 2002; Combettes & Yamada, 2015)). *Assume  $T_1 : \mathbb{R}^d \rightarrow \mathbb{R}^d$  and  $T_2 : \mathbb{R}^d \rightarrow \mathbb{R}^d$  are  $\theta_1$  and  $\theta_2$ -averaged, respectively. Then  $T_1 T_2$  is  $\frac{\theta_1 + \theta_2 - 2\theta_1 \theta_2}{1 - \theta_1 \theta_2}$ -averaged.*

**Lemma 6.** *Let  $T : \mathbb{R}^d \rightarrow \mathbb{R}^d$ .  $-T$  is  $\theta$ -averaged if and only if  $T \circ (-I)$  is  $\theta$ -averaged.*

*Proof.* The lemma follows from the fact that

$$T \circ (-I) = \theta R + (1 - \theta)I \quad \Leftrightarrow \quad -T = \theta(-R) \circ (-I) + (1 - \theta)I$$

for some nonexpansive  $R$  and that nonexpansiveness of  $R$  and implies nonexpansiveness of  $-R \circ (-I)$ . □

**Lemma 7** ((Taylor et al., 2018)). *Assume  $f$  is  $\mu$ -strongly convex and  $\nabla f$  is  $L$ -Lipschitz. Then for any  $x, y \in \mathbb{R}^d$ , we have*

$$\|(I - \alpha \nabla f)(x) - (I - \alpha \nabla f)(y)\| \leq \max\{|1 - \alpha\mu|, |1 - \alpha L|\} \|x - y\|.$$

**Lemma 8** (Proposition 5.4 of (Giselsson, 2017)). *Assume  $f$  is  $\mu$ -strongly convex, closed, and proper. Then*

$$-(2\text{Prox}_{\alpha f} - I)$$

*is  $\frac{1}{1 + \alpha\mu}$ -averaged.*

**References.** The notion of proximal operator and its well-definedness were first presented in (Moreau, 1965). The notion of averaged mappings were first introduced in (Bailion et al., 1978). The idea of Lemma 6 relates to “negatively averaged” operators from (Giselsson, 2017). Lemma 7 is proved in a weaker form as Theorem 3 of (Polyak, 1987) and in Section 5.1 of (Ryu & Boyd, 2016). Lemma 7 as stated is proved as Theorem 2.1 in (Taylor et al., 2018).

## 9. Proofs of main results

### 9.1. Equivalence of PNP-DRS and PNP-ADMM

We show the standard steps that establish equivalence of PNP-DRS and PNP-ADMM. Starting from PNP-DRS, we substitute  $z^k = x^k + u^k$  to get

$$\begin{aligned} x^{k+1/2} &= \text{Prox}_{\alpha f}(x^k + u^k) \\ x^{k+1} &= H_\sigma(x^{k+1/2} - (u^k + x^k - x^{k+1/2})) \\ u^{k+1} &= u^k + x^k - x^{k+1/2}. \end{aligned}$$

We reorder the iterations to get the correct dependency

$$\begin{aligned} x^{k+1/2} &= \text{Prox}_{\alpha f}(x^k + u^k) \\ u^{k+1} &= u^k + x^k - x^{k+1/2} \\ x^{k+1} &= H_\sigma(x^{k+1/2} - u^{k+1}). \end{aligned}$$

We label  $\tilde{y}^{k+1} = x^{k+1/2}$  and  $\tilde{x}^{k+1} = x^k$

$$\begin{aligned} \tilde{x}^{k+1} &= H_\sigma(\tilde{y}^k - u^k) \\ \tilde{y}^{k+1} &= \text{Prox}_{\alpha f}(\tilde{x}^{k+1} + u^k) \\ u^{k+1} &= u^k + \tilde{x}^{k+1} - \tilde{y}^{k+1}, \end{aligned}$$

and we get PNP-ADMM.

### 9.2. Convergence analysis

**Lemma 9.**  $H_\sigma : \mathbb{R}^d \rightarrow \mathbb{R}^d$  satisfies Assumption (A) if and only if

$$\frac{1}{1+\varepsilon} H_\sigma$$

is nonexpansive and  $\frac{\varepsilon}{1+\varepsilon}$ -averaged.

*Proof.* Define  $\theta = \frac{\varepsilon}{1+\varepsilon}$ , which means  $\varepsilon = \frac{\theta}{1-\theta}$ . Clearly,  $\theta \in [0, 1)$ . Define  $G = \frac{1}{1+\varepsilon} H_\sigma$ , which means  $H_\sigma = \frac{1}{1-\theta} G$ . Then

$$\begin{aligned} &\underbrace{\|(H_\sigma - I)(x) - (H_\sigma - I)(y)\|^2}_{\text{(TERM A)}} - \frac{\theta^2}{(1-\theta)^2} \|x - y\|^2 \\ &= \frac{1}{(1-\theta)^2} \|G(x) - G(y)\|^2 + \left(1 - \frac{\theta^2}{(1-\theta)^2}\right) \|x - y\|^2 - \frac{2}{1-\theta} \langle G(x) - G(y), x - y \rangle \\ &= \frac{1}{(1-\theta)^2} \left( \underbrace{\|G(x) - G(y)\|^2 + (1-2\theta)\|x - y\|^2 - 2(1-\theta)\langle G(x) - G(y), x - y \rangle}_{\text{(TERM B)}} \right). \end{aligned}$$

Remember that Assumption (A) corresponds to (TERM A)  $\leq 0$  for all  $x, y \in \mathbb{R}^d$ . This is equivalent to (TERM B)  $\leq 0$  for all  $x, y \in \mathbb{R}^d$ , which corresponds to  $G$  being  $\theta$ -averaged by Lemma 4.  $\square$

**Lemma 10.**  $H_\sigma : \mathbb{R}^d \rightarrow \mathbb{R}^d$  satisfies Assumption (A) if and only if

$$\frac{1}{1+2\varepsilon} (2H_\sigma - I)$$

is nonexpansive and  $\frac{2\varepsilon}{1+2\varepsilon}$ -averaged.

*Proof.* Define  $\theta = \frac{2\varepsilon}{1+2\varepsilon}$ , which means  $\varepsilon = \frac{\theta}{2(1-\theta)}$ . Clearly,  $\theta \in [0, 1)$ . Define  $G = \frac{1}{1+2\varepsilon}(2H_\sigma - I)$ , which means  $H_\sigma = \frac{1}{2(1-\theta)}G + \frac{1}{2}I$ . Then

$$\begin{aligned} & \underbrace{\|(H_\sigma - I)(x) - (H_\sigma - I)(y)\|^2}_{\text{(TERM A)}} - \frac{\theta^2}{4(1-\theta)^2}\|x-y\|^2 \\ &= \frac{1}{4(1-\theta)^2}\|G(x) - G(y)\|^2 + \left(\frac{1}{4} - \frac{\theta^2}{4(1-\theta)^2}\right)\|x-y\|^2 - \frac{1}{2(1-\theta)}\langle G(x) - G(y), x-y \rangle \\ &= \frac{1}{4(1-\theta)^2} \left( \underbrace{\|G(x) - G(y)\|^2 + (1-2\theta)\|x-y\|^2 - 2(1-\theta)\langle G(x) - G(y), x-y \rangle}_{\text{(TERM B)}} \right). \end{aligned}$$

Remember that Assumption (A) corresponds to (TERM A)  $\leq 0$  for all  $x, y \in \mathbb{R}^d$ . This is equivalent to (TERM B)  $\leq 0$  for all  $x, y \in \mathbb{R}^d$ , which corresponds to  $G$  being  $\theta$ -averaged by Lemma 4.  $\square$

**Proof of Theorem 1.** In general, if operators  $T_1$  and  $T_2$  are  $L_1$  and  $L_2$ -Lipschitz, then the composition  $T_1T_2$  is  $(L_1L_2)$ -Lipschitz. By Lemma 7,  $I - \alpha\nabla f$  is  $\max\{|1 - \alpha\mu|, |1 - \alpha L|\}$ -Lipschitz. By Lemma 9,  $H_\sigma$  is  $(1 + \varepsilon)$ -Lipschitz. The first part of the theorem following from composing the Lipschitz constants. The restrictions on  $\alpha$  and  $\varepsilon$  follow from basic algebra.  $\square$

**Proof of Theorem 2.** By Lemma 8,

$$-(2\text{Prox}_{\alpha f} - I)$$

is  $\frac{1}{1+\alpha\mu}$ -averaged, and this implies

$$(2\text{Prox}_{\alpha f} - I) \circ (-I)$$

is also  $\frac{1}{1+\alpha\mu}$ -averaged, by Lemma 6. By Lemma 10,

$$\frac{1}{1+2\varepsilon}(2H_\sigma - I)$$

is  $\frac{2\varepsilon}{1+2\varepsilon}$ -averaged. Therefore,

$$\frac{1}{1+2\varepsilon}(2H_\sigma - I)(2\text{Prox}_{\alpha f} - I) \circ (-I)$$

is  $\frac{1+2\varepsilon\alpha\mu}{1+\alpha\mu+2\varepsilon\alpha\mu}$ -averaged by Lemma 5, and this implies

$$-\frac{1}{1+2\varepsilon}(2H_\sigma - I)(2\text{Prox}_{\alpha f} - I)$$

is also  $\frac{1+2\varepsilon\alpha\mu}{1+\alpha\mu+2\varepsilon\alpha\mu}$ -averaged, by Lemma 6.

Using the definition of averagedness, we can write

$$(2H_\sigma - I)(2\text{Prox}_{\alpha f} - I) = -(1+2\varepsilon) \left( \frac{\alpha\mu}{1+\alpha\mu+2\varepsilon\alpha\mu}I + \frac{1+2\varepsilon\alpha\mu}{1+\alpha\mu+2\varepsilon\alpha\mu}R \right)$$

where  $R$  is a nonexpansive operator. Plugging this into the PNP-DRS operator, we get

$$\begin{aligned} T &= \frac{1}{2}I - \frac{1}{2}(1+2\varepsilon) \left( \frac{\alpha\mu}{1+\alpha\mu+2\varepsilon\alpha\mu}I + \frac{1+2\varepsilon\alpha\mu}{1+\alpha\mu+2\varepsilon\alpha\mu}R \right) \\ &= \underbrace{\frac{1}{2(1+\alpha\mu+2\varepsilon\alpha\mu)}}_{=A} I - \underbrace{\frac{(1+2\varepsilon\alpha\mu)(1+2\varepsilon)}{2(1+\alpha\mu+2\varepsilon\alpha\mu)}}_{=B} R, \end{aligned} \tag{1}$$

where define the coefficients  $A$  and  $B$  for simplicity. Clearly,  $A > 0$  and  $B > 0$ . Then we have

$$\begin{aligned} \|Tx - Ty\|^2 &= A^2\|x - y\|^2 + B^2\|R(x) - R(y)\|^2 - 2\langle A(x - y), B(R(x) - R(y)) \rangle \\ &\leq A^2\left(1 + \frac{1}{\delta}\right)\|x - y\|^2 + B^2(1 + \delta)\|R(x) - R(y)\|^2 \\ &\leq \left(A^2\left(1 + \frac{1}{\delta}\right) + B^2(1 + \delta)\right)\|x - y\|^2 \end{aligned}$$

for any  $\delta > 0$ . The first line follows from plugging in (1). The second line follows from applying Young's inequality to the inner product. The third line follows from nonexpansiveness of  $R$ .

Finally, we optimize the bound. It is a matter of simple calculus to see

$$\min_{\delta > 0} \left\{ A^2\left(1 + \frac{1}{\delta}\right) + B^2(1 + \delta) \right\} = (A + B)^2.$$

Plugging this in, we get

$$\|Tx - Ty\|^2 \leq (A + B)^2\|x - y\|^2 = \left(\frac{1 + \varepsilon + \varepsilon\alpha\mu + 2\varepsilon^2\alpha\mu}{1 + \alpha\mu + 2\varepsilon\alpha\mu}\right)^2\|x - y\|^2,$$

which is the first part of the theorem.

The restrictions on  $\alpha$  and  $\varepsilon$  follow from basic algebra. □

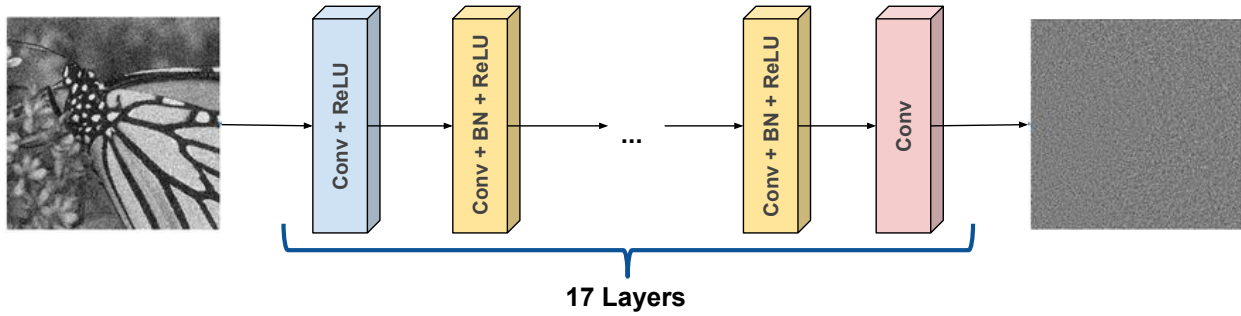

Figure 3. DnCNN Network Architecture

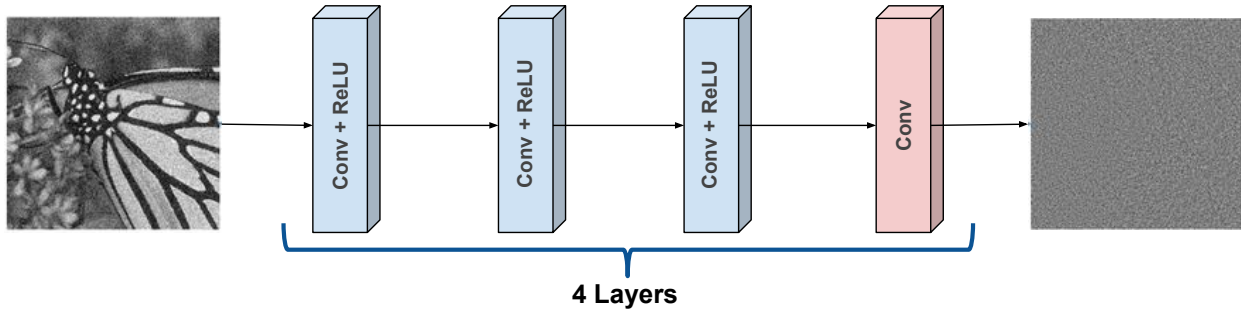

Figure 4. SimpleCNN Network Architecture
